# Supplementary material for: Impact of climate and land use on the temporal variability of sand fly density in Sri Lanka: A 2-year longitudinal study
Source: PubMed Central journal article supplement (PMC11620634; doi:10.1371/journal.pntd.0012675), 2024-11-21

# PLOS Neglected Tropical Diseases

## Impact of climatic factors on the temporal variability of sand fly abundance in Sri Lanka: A 2-year longitudinal study --Manuscript Draft--

|                                                                                                                                                                                                                                                                                                                                                      |                                                                                                                                                                                                                                                                                                                                                                                                                                                                                                                                                                                                                                                                                                                                                                                                                                                                                                                                                                                                                                                                                                                                                                                                                                                                                                                                                                                                                                                                                                                                                                                                                                                                                                                                                                                                                                                                                                                                                                                                                                                                                                                                                                                                                   |
|------------------------------------------------------------------------------------------------------------------------------------------------------------------------------------------------------------------------------------------------------------------------------------------------------------------------------------------------------|-------------------------------------------------------------------------------------------------------------------------------------------------------------------------------------------------------------------------------------------------------------------------------------------------------------------------------------------------------------------------------------------------------------------------------------------------------------------------------------------------------------------------------------------------------------------------------------------------------------------------------------------------------------------------------------------------------------------------------------------------------------------------------------------------------------------------------------------------------------------------------------------------------------------------------------------------------------------------------------------------------------------------------------------------------------------------------------------------------------------------------------------------------------------------------------------------------------------------------------------------------------------------------------------------------------------------------------------------------------------------------------------------------------------------------------------------------------------------------------------------------------------------------------------------------------------------------------------------------------------------------------------------------------------------------------------------------------------------------------------------------------------------------------------------------------------------------------------------------------------------------------------------------------------------------------------------------------------------------------------------------------------------------------------------------------------------------------------------------------------------------------------------------------------------------------------------------------------|
| <b>Manuscript Number:</b>                                                                                                                                                                                                                                                                                                                            | PNTD-D-24-00582                                                                                                                                                                                                                                                                                                                                                                                                                                                                                                                                                                                                                                                                                                                                                                                                                                                                                                                                                                                                                                                                                                                                                                                                                                                                                                                                                                                                                                                                                                                                                                                                                                                                                                                                                                                                                                                                                                                                                                                                                                                                                                                                                                                                   |
| <b>Full Title:</b>                                                                                                                                                                                                                                                                                                                                   | Impact of climatic factors on the temporal variability of sand fly abundance in Sri Lanka: A 2-year longitudinal study                                                                                                                                                                                                                                                                                                                                                                                                                                                                                                                                                                                                                                                                                                                                                                                                                                                                                                                                                                                                                                                                                                                                                                                                                                                                                                                                                                                                                                                                                                                                                                                                                                                                                                                                                                                                                                                                                                                                                                                                                                                                                            |
| <b>Short Title:</b>                                                                                                                                                                                                                                                                                                                                  | Climate variability and sand fly abundance in Sri Lanka                                                                                                                                                                                                                                                                                                                                                                                                                                                                                                                                                                                                                                                                                                                                                                                                                                                                                                                                                                                                                                                                                                                                                                                                                                                                                                                                                                                                                                                                                                                                                                                                                                                                                                                                                                                                                                                                                                                                                                                                                                                                                                                                                           |
| <b>Article Type:</b>                                                                                                                                                                                                                                                                                                                                 | Research Article                                                                                                                                                                                                                                                                                                                                                                                                                                                                                                                                                                                                                                                                                                                                                                                                                                                                                                                                                                                                                                                                                                                                                                                                                                                                                                                                                                                                                                                                                                                                                                                                                                                                                                                                                                                                                                                                                                                                                                                                                                                                                                                                                                                                  |
| <b>Keywords:</b>                                                                                                                                                                                                                                                                                                                                     | P. argentipes, sand flies, vector, climate, Leishmania, parasite                                                                                                                                                                                                                                                                                                                                                                                                                                                                                                                                                                                                                                                                                                                                                                                                                                                                                                                                                                                                                                                                                                                                                                                                                                                                                                                                                                                                                                                                                                                                                                                                                                                                                                                                                                                                                                                                                                                                                                                                                                                                                                                                                  |
| <b>Abstract:</b>                                                                                                                                                                                                                                                                                                                                     | <p><b>Background</b><br/>Phlebotomine sandflies are the vectors of leishmaniasis. The sand fly abundance tends to be influenced by context-specific climatic and non-climatic factors. Thus, we aimed to understand how these factors drive sand fly density in ten sentinel sites across Sri Lanka.</p> <p><b>Methodology/Principal Findings</b><br/>We analysed monthly collections of sand flies and climate data from ten sentinel sites representing all geo-climatic zones across Sri Lanka, over 24 months. Site-specific non-climate data was also recorded. The influence of climate and non-climate drivers on sand fly abundance in each site was calculated using distributed lag non-linear models and machine learning. We found that climate plays a major role on sandfly abundance compared to non-climate factors. Increase in rainfall and relative humidity at real time, and ambient temperature and soil temperature with a 2-month lag were associated with a statistically significant increase in sand fly density. The maximum relative risk (RR) was 3.76 (95% CI: 1.58-8.96) for rainfall at 120 mm/month, 2.14 (95% CI: 1.04-4.38) for relative humidity at 82%, 2.81 (95% CI: 1.09-7.35) both at real time. For ambient temperature at 34.5°C, and 11.6 (95%CI: 4.38-30.76) for soil temperature at 31.5oC; latter 2 variables with a 2-month lag period. A similar delayed association was also seen with the rise of soil temperature and evaporation rates. The real-time increase in ambient temperature, sunshine hours, and evaporation rate, however, reduced sand fly burden homogeneously in all study settings. The high density of chena and coconut cultivation, together with low density of dense forests, homesteads, and low human footprint values, positively influenced sandfly densities.</p> <p><b>Conclusions/Significance</b><br/>The findings would enhance understanding of the dynamic influence of environment on sand flies and leishmaniasis spread, laying a foundation for forecasting of sand fly burden and targeted site-specific interventions for mitigating the growing burden of leishmaniasis, particularly in an era of climate change.</p> |
| <b>Additional Information:</b>                                                                                                                                                                                                                                                                                                                       |                                                                                                                                                                                                                                                                                                                                                                                                                                                                                                                                                                                                                                                                                                                                                                                                                                                                                                                                                                                                                                                                                                                                                                                                                                                                                                                                                                                                                                                                                                                                                                                                                                                                                                                                                                                                                                                                                                                                                                                                                                                                                                                                                                                                                   |
| <b>Question</b>                                                                                                                                                                                                                                                                                                                                      | <b>Response</b>                                                                                                                                                                                                                                                                                                                                                                                                                                                                                                                                                                                                                                                                                                                                                                                                                                                                                                                                                                                                                                                                                                                                                                                                                                                                                                                                                                                                                                                                                                                                                                                                                                                                                                                                                                                                                                                                                                                                                                                                                                                                                                                                                                                                   |
| <p><b>Government Employee</b></p> <p>Are you or any of the contributing authors an employee of the United States government?</p> <p>Manuscripts authored by one or more US Government employees are not copyrighted, but are licensed under a <a href="#">CC0 Public Domain Dedication</a>, which allows unlimited distribution and reuse of the</p> | <p>No - No authors are employees of the U.S. government.</p>                                                                                                                                                                                                                                                                                                                                                                                                                                                                                                                                                                                                                                                                                                                                                                                                                                                                                                                                                                                                                                                                                                                                                                                                                                                                                                                                                                                                                                                                                                                                                                                                                                                                                                                                                                                                                                                                                                                                                                                                                                                                                                                                                      |

|                                                                                                                                                                                                                                                                                                                                                                                                                                                                                                                                                                                                                                                                                                                                                                                                                                                                                                                                                                                                                                                              |                                                                                                                                                                                              |
|--------------------------------------------------------------------------------------------------------------------------------------------------------------------------------------------------------------------------------------------------------------------------------------------------------------------------------------------------------------------------------------------------------------------------------------------------------------------------------------------------------------------------------------------------------------------------------------------------------------------------------------------------------------------------------------------------------------------------------------------------------------------------------------------------------------------------------------------------------------------------------------------------------------------------------------------------------------------------------------------------------------------------------------------------------------|----------------------------------------------------------------------------------------------------------------------------------------------------------------------------------------------|
| <p>article for any lawful purpose. This is a legal requirement for US Government employees.</p> <p>This will be typeset if the manuscript is accepted for publication.</p>                                                                                                                                                                                                                                                                                                                                                                                                                                                                                                                                                                                                                                                                                                                                                                                                                                                                                   |                                                                                                                                                                                              |
| <p><b>Financial Disclosure</b></p> <p>Enter a financial disclosure statement that describes the sources of funding for the work included in this submission. Review the <a href="#">submission guidelines</a> for detailed requirements. View published research articles from <a href="#">PLOS Neglected Tropical Diseases</a> for specific examples.</p> <p>This statement is required for submission and <b>will appear in the published article</b> if the submission is accepted. Please make sure it is accurate.</p> <p><b>Funded studies</b></p> <p>Enter a statement with the following details:</p> <ul style="list-style-type: none"> <li>• Initials of the authors who received each award</li> <li>• Grant numbers awarded to each author</li> <li>• The full name of each funder</li> <li>• URL of each funder website</li> <li>• Did the sponsors or funders play any role in the study design, data collection and analysis, decision to publish, or preparation of the manuscript?</li> </ul> <p>Did you receive funding for this work?</p> | <p>Yes</p>                                                                                                                                                                                   |
| <p>Please add funding details as follow-up to "<b>Financial Disclosure</b></p> <p>Enter a financial disclosure statement that describes the sources of funding for the work included in this submission. Review the <a href="#">submission guidelines</a> for detailed requirements. View published research articles from <a href="#">PLOS Neglected Tropical Diseases</a> for specific examples.</p> <p>This statement is required for submission</p>                                                                                                                                                                                                                                                                                                                                                                                                                                                                                                                                                                                                      | <p>Research reported in this publication was supported by the National Institute of Allergy and Infectious Diseases of the National Institutes of Health under Award Number U01AI136033.</p> |

and **will appear in the published article** if the submission is accepted. Please make sure it is accurate.

#### Funded studies

Enter a statement with the following details:

- Initials of the authors who received each award
- Grant numbers awarded to each author
- The full name of each funder
- URL of each funder website
- Did the sponsors or funders play any role in the study design, data collection and analysis, decision to publish, or preparation of the manuscript?

Did you receive funding for this work?"

Please select the country of your main research funder (please select carefully as in some cases this is used in fee calculation).

as follow-up to "**Financial Disclosure**

Enter a financial disclosure statement that describes the sources of funding for the work included in this submission. Review the [submission guidelines](#) for detailed requirements. View published research articles from [PLOS Neglected Tropical Diseases](#) for specific examples.

This statement is required for submission and **will appear in the published article** if the submission is accepted. Please make sure it is accurate.

#### Funded studies

Enter a statement with the following details:

- Initials of the authors who received each award
- Grant numbers awarded to each author
- The full name of each funder
- URL of each funder website
- Did the sponsors or funders play any role in the study design, data collection and analysis, decision to publish, or preparation of the manuscript?

SRI LANKA - LK

|                                                                                                                                                                                                                                                                                                                                                                                                                                                                                                                                                                                                                |                                                                                          |
|----------------------------------------------------------------------------------------------------------------------------------------------------------------------------------------------------------------------------------------------------------------------------------------------------------------------------------------------------------------------------------------------------------------------------------------------------------------------------------------------------------------------------------------------------------------------------------------------------------------|------------------------------------------------------------------------------------------|
| <p>Did you receive funding for this work?"</p>                                                                                                                                                                                                                                                                                                                                                                                                                                                                                                                                                                 |                                                                                          |
| <p><b>Competing Interests</b></p> <p>On behalf of all authors, disclose any competing interests that could be perceived to bias this work.</p> <p>This statement will be typeset if the manuscript is accepted for publication.</p> <p>Review the instructions link below and PLOS NTDs' <a href="#">competing interests</a> policy to determine what information must be disclosed at submission.</p>                                                                                                                                                                                                         | <p>No competing interests.</p>                                                           |
| <p><b>Data Availability</b></p> <p>Provide a <b>Data Availability Statement</b> in the box below. This statement should detail where the data used in this submission can be accessed. This statement will be typeset if the manuscript is accepted for publication.</p> <p>Before publication, authors are required to make all data underlying their findings fully available, without restriction. Review our <a href="#">PLOS Data Policy</a> page for detailed information on this policy. Instructions for writing your Data Availability statement can be accessed via the Instructions link below.</p> | <p>All relevant data are within the manuscript and its Supporting Information files.</p> |

1 **Title Page**

2 **Impact of climatic factors on the temporal variability of sand fly abundance in Sri**

3 **Lanka: A 2-year longitudinal study**

4 Short title

5 Climate variability and sand fly abundance in Sri Lanka

6 Sanath C Senanayake<sup>a#</sup>, Prasad Liyanage<sup>b#</sup>, Dulani R.K. Pathirage<sup>a</sup>, M.F. Raushan

7 Siraj<sup>a</sup>, B. G. D. Nissanka Kolitha De Silva<sup>c</sup>, Nadira D Karunaweera<sup>a\*</sup>

8

9 <sup>a</sup>Department of Parasitology, Faculty of Medicine, University of Colombo, Colombo, Sri  
10 Lanka.

11 <sup>b</sup>Department of Research and Evaluation, National Institute of Health Sciences Kalutara,  
12 Sri Lanka.

13 <sup>c</sup>Center for Biotechnology, Department of Zoology, Faculty of Applied Sciences,  
14 University of Sri Jayewardenepura, Nugegoda, Sri Lanka.

15 #Joint first authors

16 \*Corresponding author

17

18

19

20

21

22

23

24 Emails:

25 SCS: [sanath@parasit.cmb.ac.lk](mailto:sanath@parasit.cmb.ac.lk)

26 PL: [prasadgliyanage@gmail.com](mailto:prasadgliyanage@gmail.com)

27 DRKP: [pathiragedulani@gmail.com](mailto:pathiragedulani@gmail.com)

28 MFRS: [raushansiraj@hotmail.com](mailto:raushansiraj@hotmail.com)

29 BGDNK: [nissankakolitha@gmail.com](mailto:nissankakolitha@gmail.com)

30 NDK: [nadira@parasit.cmb.ac.lk](mailto:nadira@parasit.cmb.ac.lk)

31

32 **Abstract**

33 **Background**

34 Phlebotomine sandflies are the vectors of leishmaniasis. The sand fly abundance  
35 tends to be influenced by context-specific climatic and non-climatic factors. Thus, we  
36 aimed to understand how these factors drive sand fly density in ten sentinel sites across  
37 Sri Lanka.

38 **Methodology/Principal Findings**

39 We analysed monthly collections of sand flies and climate data from ten sentinel sites  
40 representing all geo-climatic zones across Sri Lanka, over 24 months. Site-specific non-  
41 climate data was also recorded. The influence of climate and non-climate drivers on  
42 sand fly abundance in each site was calculated using distributed lag non-linear models  
43 and machine learning. We found that climate plays a major role on sandfly abundance  
44 compared to non-climate factors. Increase in rainfall and relative humidity at real time,  
45 and ambient temperature and soil temperature with a 2-month lag were associated with  
46 a statistically significant increase in sand fly density. **The maximum relative risk (RR)**  
47 **was 3.76 (95% CI: 1.58-8.96) for rainfall at 120 mm/month, 2.14 (95% CI: 1.04-4.38) for**  
48 **relative humidity at 82%, 2.81 (95% CI: 1.09-7.35) both at real time.** For ambient  
49 temperature at 34.5°C, and 11.6 (95%CI; 4.38-30.76) for soil temperature at 31.5°C;  
50 latter 2 variables with a 2-month lag period. A similar delayed association was also  
51 seen with the rise of ~~soil temperature~~ and evaporation rates. The real-time increase in  
52 ambient temperature, sunshine hours, and evaporation rate, however, reduced sand fly  
53 burden homogeneously in all study settings. The high density of chena and coconut

54 ~~cultivation~~, together with low density of dense forests, homesteads, and low human  
55 footprint values, positively influenced sandfly densities.

56

## 57 **Conclusions/Significance**

58 The findings would enhance understanding of the dynamic influence of  
59 environment on sand flies and leishmaniasis spread, laying a foundation for ~~for~~  
60 forecasting of sand fly ~~burden and targeted~~ site-specific interventions for mitigating the  
61 growing burden of leishmaniasis, particularly in an era of climate change.

62



63 **Author Summary**

64 Leishmaniasis, a public health problem in the tropics is ~~transmitted by sand flies~~. Both  
65 climatic and non-climatic factors may affect ~~sand flies~~. Thus, we aimed to understand  
66 how these factors influence sand fly density in 10 field sites across Sri Lanka with  
67 varying eco-climatic conditions.

68 Monthly collections of sand flies over 24 months were analysed, and the influence of  
69 climate and non-climate divers on the sand fly ~~burden~~ was calculated. We found that  
70 climate plays a major role on **sandfly** abundance compared to non-climate factors. An  
71 increase in rainfall and relative humidity were associated with a prominent increase in  
72 sand fly density. Similar effects were seen with the rise of ambient and soil temperature  
73 and evaporation rates, albeit with a 2-month lag period. The increase in ambient  
74 temperature, sunshine hours, and evaporation rate in the real-time, however, uniformly  
75 reduced sand fly burden. ~~A high chena and coconut cultivation densities~~, along with  
76 sparse forests, homesteads, and reduced human footprint indices, positively influenced  
77 **sandfly** densities.

78 The findings promote a better understanding of the changing climatic and environmental  
79 influence on sand fly vectors and leishmaniasis spread, providing a foundation for the  
80 development of targeted interventions for sand fly and disease control.

81

82

83 **Keywords:** *P. argentipes*, sand flies, vector, climate, *Leishmania*, parasite

84

85

86

## 87 **Introduction**

88           The subfamily Phlebotomine (sand flies) includes as many as 800 species[1]. Sand  
89 flies are small (2 to 3mm in size) hairy hematophagous insects that live in warm tropical  
90 and sub-tropical regions between 50°N and 40°S [2]. Sand flies can transmit several  
91 bacterial, viral, and parasitic diseases, including leishmaniasis [3]. Leishmaniasis are a  
92 group of diseases caused by more than 20 *Leishmania* species of parasites transmitted  
93 through the bites of infected female phlebotomine sand flies [1]. More than 90 sand fly  
94 vectors are known to transmit the parasite. The type of resultant disease in leishmaniasis  
95 depends on the causative *Leishmania* species, in large part with clinical manifestations  
96 ranging from self-limiting cutaneous lesions to life-threatening visceral disease [1]. The  
97 clinical outcome depends on the fine interplay between parasite, vector, and host factors,  
98 mainly with the involvement of the immune system [4]. Accordingly, the disease has three  
99 main forms; visceral (VL), the most serious form; mucocutaneous (MCL), the most  
100 disabling and cutaneous (CL), the most common [1]. It is estimated that between 0.7 to 1  
101 million new cases of cutaneous leishmaniasis occur annually, ranking it third among  
102 neglected tropical diseases [5]. Although the disease is endemic in approximately a  
103 hundred tropical and sub-tropical countries, over 85% of new cases are concentrated in  
104 ten countries: Afghanistan, Algeria, Brazil, Colombia, Iraq, Libya, Pakistan, Peru, the  
105 Syrian Arab Republic and Tunisia [1]. The disease is associated with poverty, poor living  
106 conditions, and environmental changes such as deforestation, dam construction,  
107 irrigation schemes, and urbanization [6–8].

108 Leishmaniasis is a climate-sensitive disease since the ~~the *Phlebotomus*~~ vectors are  
109 thermophilic, requiring warm temperatures for survival. The developmental stages of  
110 these vectors include eggs, larvae, pupae, and adults. The immature stages do not  
111 require standing water to complete the life cycle. The hatching of eggs is highly dependent  
112 on temperature, with first instar larvae emerging 12 to 19 days after oviposition, pupae in  
113 25 to 59 days, and adults in 35 to 69 days [9]. Laboratory studies have shown that extreme  
114 temperatures below 15°C and above 32°C have a negative impact on the fecundity and  
115 longevity of these flies [10]. The influence of weather variables such as rainfall, relative  
116 humidity, soil water stress, evaporation rate, wind speed and El Nino Southern Oscillation  
117 on the transmission of leishmaniasis had been evaluated in the past across different  
118 endemic settings, but the reported associations are inconsistent [11–16]. This  
119 heterogeneity could be largely due to the type of data and methods used in the analysis,  
120 the location-specific influences of the climate on vector bionomics of the sand fly species  
121 and the transmission dynamics of the respective disease entities.

122 Leishmaniasis has become a significant public health issue in Sri Lanka. In  
123 contrast to the declining disease trends observed in other Southeast Asian countries, Sri  
124 Lanka has been experiencing a steady increase in case numbers of leishmaniasis with  
125 an exponential rise in 2018 [17]. Almost all the leishmaniasis clinical cases in Sri Lanka  
126 are CL caused by *Leishmania donovani* [18]. The parasite is probably transmitted through  
127 the species *Phlebotomus argentipes glaucus*, which demonstrates zoophilic behavior  
128 compared to ~~other~~-related species in India [19,20]. The continuous upsurge of disease  
129 transmission in the country warrants urgent attention to design effective control  
130 interventions that might enable meeting equivalent elimination targets as established for

131 VL in the region. These targets involve reducing the incidence to less than one case per  
132 10,000 population [21,22]; the targets specified by the WHO roadmap for neglected  
133 tropical diseases 2021-2030 [23]. Climate change and related environmental and socio-  
134 economic impacts may catalyze the transmission dynamics in future, further aggravating  
135 the existing disease burden. Within this context, it is important to understand the intricate  
136 relationship between climate, environmental factors, and sand fly densities to face the  
137 growing burden of sand fly-borne diseases. The current study describes the distribution  
138 of the sand fly species in different geographic zones related to disease hotspots, and the  
139 influence of local weather and non-climate factors on the sand fly abundance in Sri Lanka  
140 that are relevant and applicable for the planning of successful interventions for control of  
141 leishmaniasis in any endemic country.

142

## 143 **Methods**

### 144 **Study areas meteorological and Georeferenced land-use data**

145 Sri Lanka is an island with an area of 65,525 km<sup>2</sup> located between latitudes 5<sup>0</sup>55'  
146 and 9<sup>0</sup>51'N and longitudes 79<sup>0</sup>41 and 81<sup>0</sup>53'E. The country is divided into four climatic  
147 zones based predominantly on the rainfall, viz. wet zone, intermediate zone, dry zone,  
148 and semi-arid zone. The wet zone, located in the southwest part of the island and central  
149 hills, receives the maximum rainfall in the country with an annual average of over  
150 2500mm. The maximum rainfall occurs during the southwest (SW) monsoon from May to  
151 September and the northeast (NE) monsoon from November to January. The dry zone  
152 covers most parts of the country and receives an annual rainfall between 1200 and  
153 1900mm during the NE monsoon with little or no rain for the rest of the year. An

154 intermediate zone situated between wet and dry zones in the island receives an average  
155 annual rainfall of 1500-2500mm, whereas the semi-arid zones situated within the dry zone  
156 of the country receive an average annual rainfall of 800-1200mm [24,25]. The country is  
157 divided into 25 districts for administrative purposes, and they are nested within 9  
158 provinces. Nine sentinel sites were strategically chosen to conduct sand fly collections,  
159 aiming to closely represent each province and encompass all climate zones. An additional  
160 sentinel site, Delft, situated on Delft Island in the Palk Strait, was chosen from the  
161 Northern province. The location of the sentinel site within each province was based on  
162 the case records of each Medical Officer of Health (MOH) area during the year 2017 as  
163 maintained at the Epidemiology Unit, Ministry of Health and also in consultation with the  
164 respective Public Health Officials. A perimeter of 5km from the sentinel site was used to  
165 study topological factors such as vegetation cover and land use patterns, including water  
166 bodies. We also considered the human pressure on the study settings as quantified by  
167 the Human Footprint Index (HFI). The ten sentinel sites represented all climate zones of  
168 Sri Lanka and were named as per the township that they belonged to, viz. Delft Island,  
169 Welioya, Thalawa, Mahaoya, Peradeniya, Ambanpola, Kataragama, Mamadala,  
170 Mirigama and Dickwella (Table 1).

171

172

173

174

175

176

177 **Table 1. Characteristics of the sentinel sites.**

| Province      | District     | Township and GPS coordinate of site | Altitude category# | Climatic zone## | CL cases reported* |
|---------------|--------------|-------------------------------------|--------------------|-----------------|--------------------|
| North-western | Kurunegala   | Ambanpola<br>80.2463E/7.89703N      | Lowland            | Intermediate    | Yes                |
| Southern      | Matara       | Dickwella<br>80.7015E/5.97627N      | Coastal            | Wet zone        | Yes                |
| Northern      | Jaffna       | Delft island<br>79.4314E/9.31090N   | Coastal            | Dry zone        | Rare               |
| Northern      | Mullaitivu   | Welioya<br>80.8110E/8.98232N        | Coastal            | Dry zone        | Rare               |
| Southern      | Hambantota   | Mamadala<br>80.9667E/6.17158N       | Lowland            | Dry Zone        | Yes                |
| Uva           | Monaragala   | Kataragama<br>81.3132E/6.42649N     | Lowland            | Dry zone        | Rare               |
| Eastern       | Ampara       | Mahaoya<br>81.3234E/7.48443N        | Lowland            | Dry zone        | Rare               |
| Western       | Gampaha      | Mirigama<br>80.0967E/7.22750N       | Lowland            | Wet zone        | Rare               |
| Central       | Kandy        | Peradeniya<br>80.6007E/7.26643N     | Highland           | Wet zone        | Rare               |
| North Central | Anuradhapura | Thalawa<br>80.3400E/8.19928N        | Lowland            | Dry zone        | Yes                |

178 #Altitude category: Coastal: Surrounds the island with elevation of about 30 m above sea  
 179 level; Lowland: 30 to 1000m above sea level; Highland: mountainous areas with an  
 180 elevation of 1000 to 2500 m above sea level.

181 ##Climatic zone: Arbitrary division of the island based on annual rainfall

182 \*The CL cases were considered rare if the annual case incidence was less than 10 cases  
 183 per 100,000 population in 2017 as per patient data maintained at the Epidemiology Unit,  
 184 Ministry of Health.

185

186 **Sand fly collection**

187           The adult sand flies were collected from March 2018 to February 2020 in ten  
188 sentinel sites over twenty-four months. Each site was equipped with UV LED CDC light  
189 traps (LT) a product of BioQuip, USA (S1 Fig 1A) and cattle-baited net traps (CBNT) (S1  
190 Fig 1B). The CBNTs used were 10 x 10 feet in size and a single animal was placed within  
191 the trap and kept overnight. Sand fly samples were collected using a manual aspirator at  
192 10 pm and 4 am. The trapping was conducted for two consecutive days per month using  
193 ten LTs and one CBNT per night. However, in Delft Island, sand fly collections were done  
194 only twice a year due to logistical constraints. The CBNT was placed in a constant place  
195 while the ten LTs were placed in 20 houses in rotation within a radius of 500m to CBNT.  
196 A minimum distance of about 50m was maintained between CBNT and LTs. The distance  
197 between the houses ranged from 10m to 200m depending on the area. The S1 Fig 2  
198 shows the placement of CBNT and LTs in the Kataragama sentinel site. The same  
199 methodology was in all sites including the Delft Island. However, the data from Delft  
200 collections were used only for the descriptive analysis and excluded from the time series  
201 analysis due to less frequent sampling. Another exception was Peradeniya, where the  
202 trapping was done monthly with predominant use of LTs, due to the difficulties in obtaining  
203 cattle for CBNTs (only two CBNT cycles were completed). The collected sand flies were  
204 preserved in absolute ethanol and transported to the laboratory for further analysis.  
205 Species identification of collected sand flies was done based on morphological features  
206 using standard keys [26]. Forty-eight cattle-baited trap nights and 960 light trap nights  
207 were used across the country to collect *P. argentipes* during the study period. Monthly  
208 total (LT total and CBNT total) and average (LT average and CBNT average) *P.*

209 *argentipes* sand fly densities were calculated using the insect collections in ten LTs and  
210 one CBNT for each site respectively.

## 211 **Climate data**

212 Monthly mean rainfall, ambient temperature (minimum and maximum), relative  
213 humidity, wind speed, soil temperature (measured at 08:30 and 15:30 hours at 5cm and  
214 10cm depth), evaporation and sunshine hours data from March 2018 to February 2020  
215 were obtained from the Meteorological Department of Sri Lanka. The meteorological  
216 stations located closest to the sampling sites were selected based on GPS coordinates.  
217 We further utilized the remotely sensed climate data downloaded from the ERA5-Land  
218 hourly data repository accessible from the Copernicus Climate Change Service Climate  
219 Data Store [27]. ~~Remotely sensed~~ climate data for rainfall, temperature, wind speed and  
220 soil temperature within a 5km buffer around the geolocations of the surveillance sites  
221 were used to supplement the ground level monitoring data where necessary. The ERA  
222 datasets (ERA5 and ERA-Interim) do not directly archive Relative Humidity (RH).  
223 Therefore, RH was derived from near-surface temperature and dew point temperature  
224 based on the Bolton formula [28]. Nevertheless, information on sunshine hours was only  
225 accessible for five study locations (Embilipitiya, Thalawa, Ambanpola, Kataragama, and  
226 Dickwella). The S1 Fig 3 shows the ~~month-specific variability~~ of climate variables  
227 averaged across all study settings.

228

## 229 **Non-climate contextual information in study settings**

230 Location-specific characteristics, which could further modify the relationship  
231 between weather variability and sand fly density, were obtained for the 5km buffer area



232 around the surveillance sites. Geo-referenced land-use data was obtained from the Sri  
233 Lanka Survey Department [29]. The land-use data was clipped and extracted from the  
234 5km buffer around the sentinel site using ArcGIS software. The area of each land-use  
235 type was derived using a geometry calculator. The land use values were exported as a  
236 database file, which was opened through the Excel application, and the spread of equal  
237 land-use categories were totalled using the PivotTable in the Excel application. Land use  
238 variables included land areas of paddy fields, dense forests, coconut cultivars, chena  
239 cultivars, marshy lands, scrubs lands, rocks, reservoirs, streams, water bodies,  
240 cemeteries and homesteads. In addition to these variables, we utilized the human  
241 footprint index (HFI), which integrates eight key indicators at a fine spatial resolution (30  
242 arcsec), including built environments, population density, electric infrastructure, crop and  
243 pasture lands, roads, railways, and navigable waterways to quantify anthropogenic  
244 pressures across nine surveillance sites. The HFI is a dimensionless index calculated as  
245 a continuous scale of increasing human pressure from 0 to 50 where more than 12 is  
246 considered to be areas with intense human pressure [30]. Furthermore, the HFI provides  
247 spatially explicit and temporarily inter-comparable measures of human interaction with  
248 the environment and local natural systems. We utilized the most updated HFI maps  
249 available, which were generated up to 2019 using a machine-learning method based on  
250 the original HFI dataset accessible from 2000 to 2013 [31]. We extracted the average HFI  
251 for each study year for a buffer of 5km at each surveillance site. The distribution of these  
252 variables among each surveillance site is given in the S1 Table 1.

253

254 **Leishmaniasis incidence**

255 Leishmaniasis is included in the list of notifiable diseases in Sri Lanka and  
256 subjected to mandatory notification to the national integrated communicable disease  
257 surveillance system in the country. The number of leishmaniasis cases from March 2017  
258 to February 2020 and the annual average incidence rates of leishmaniasis per 100,000  
259 population by each district were obtained from the Epidemiology Unit, Ministry of Health  
260 of Sri Lanka [17].

261

## 262 **Statistical analysis**

263 Here we used a combination of two analytical approaches. Firstly, we utilized  
264 distributed lag non-linear models (DLNMs) [32] in a two-staged hierarchical meta-  
265 analytical framework [33] to assess the delayed (lagged) association between climate  
266 variables and sand fly densities across all sentinel sites in Sri Lanka. Secondly, we  
267 employed XGBoost, an ensemble ~~decision~~ tree method, to ascertain how these lagged  
268 climate variables, along with context-specific non-climate variables, contribute to sand fly  
269 densities across study settings [34]. One of the notable advantages of XGBoost over  
270 other machine learning algorithms is its capability to adjust for features with minimal data  
271 pre-processing and feature engineering requirements. Furthermore, it effectively handles  
272 highly nonlinear, correlated, and interactive covariates which cannot be implemented  
273 withing the DLNM framework alone.

274

## 275 **Evaluating the lagged influence of climate variables on sand fly densities**

276 The DLNMs implemented in the R package *dlnm* (version number 2.4.6) use the  
277 concept of creating flexible cross-basis function estimators to capture simultaneously the

278 delayed and non-linear dependencies of the exposure and outcome data [35]. In the first  
279 stage, the exposure-lag-response association for each study setting were flexibly  
280 estimated using ground level and remotely sensed weather data. A quasi-Poisson time  
281 series regression model was used to account for the over-dispersion of data and the  
282 influence of time-varying confounders. The common formula for the first stage sentinel  
283 site-specific models for weather variables and sand fly density indices is given as

284

$$285 \quad VI_i \sim \text{quasiPoisson}(\mu_i)$$

286

$$287 \quad E(VI_{ti}) = \beta_i + f(\text{Weather}_{ti}, \text{vardf}, \text{lagdf}) + s(T_{ti}, \text{timedf})$$

288

289 Where  $E(VI_{ti})$  was the expected value for each sand fly density measurements (LT  
290 average, LT total and CBNT average) obtained by LTs and CBNTs in each month ( $t$ ) in  
291 each surveillance setting ( $i$ ).  $\beta$  was the intercept, and  $f(\text{Weather}_{ti}, \text{vardf}, \text{lagdf})$  was the  
292 cross-basis function for each weather variable (rainfall, maximum, minimum and mean  
293 temperature, soil temperature, relative humidity, sunshine hours etc. respectively, in each  
294 model). The  $\text{vardf}$  and  $\text{lagdf}$  were the corresponding degrees of freedom set for weather  
295 variables.  $s(T_{ti}, \text{timedf})$  was the smooth function of time with the degrees of freedom used  
296 to account for the time-varying confounders on the outcome. We used lag up to three  
297 months considering the lifecycle of sandfly vectors to capture all biologically plausible  
298 associations between climate variables and sand fly densities.

299 In the second stage, the surveillance site-specific exposure-response associations were  
300 meta-analysed to obtain joint estimates for the country accounting for within and in-

301 between surveillance site-level variability. The model output was given as a relative risk  
302 (RR) estimate calculated for the full range of exposure values with reference to a risk at  
303 a predetermined central reference. We used a multivariate extension to the Cochran Q-  
304 test of heterogeneity to assess the statistical significance of the heterogeneity of the  
305 estimates at each study setting and it was further quantified by using  $I^2$  statistics [36].  
306 The models were evaluated using the quasi-Akaike information criterion (q-AIC) [37]. q-  
307 AIC values derived during the model building and selection procedure for each sandfly  
308 density measurement are given in the S1 Table 2. The lowest q-AIC values observed for  
309 LT average indicate the better model fit compared to CBNT and LT monthly total for all  
310 weather parameters. Therefore, we selected sand fly densities obtained using LT for our  
311 primary analysis and the results were compared with CBNT where relevant. Definition of  
312 the cross-basis functions with respect to different knot positioning for the best-fit models  
313 are reported in the S1 Table 3. We used *mvmeta* package (version number 1.0.3) for the  
314 second stage multi-variate meta-analysis [33,38]. The divisional heterogeneity of each  
315 climate variable is presented in the S1 Table 4.

316

### 317 **Evaluating the relative contribution of climate and non-climate variables on sand** 318 **fly densities**

319 XGBoost, that uses gradient boosting, has a comparative advantage over other  
320 tree-boosting methods in terms of its versatility, scalability, speed, and optimization to  
321 solve complex problems [35]. Recent advancements in machine-learning have led to the  
322 development of explanatory frameworks for interpreting the model outputs. These are  
323 often referred to as explainable AI (XAI). We coupled the XGBoost output with the XAI

324 post-processed model interpretation framework, Shapley Additive Explanation (SHAP),  
325 which allows us to rank the features of the model (climate and non-climate variables in  
326 the present setting) in their order of contribution [39]. SHAP determines the importance  
327 of the feature by comparing a model's predictions with and without a specific feature,  
328 considering all possible feature combinations for each observation. The ranking of  
329 features is based on their individual contributions for each observation and then averaged  
330 across all observations.

331 All lagged climate variables identified using the DLNM approach described above, along  
332 with non-climate variables given in the S1 Table 1, were incorporated in the XGBoost  
333 model. First, we trained the model using XGboost gradient-boosted tree regression  
334 algorithm using all 23 variables. To maximize the model's performance, we used a  
335 random search algorithm to tune hyperparameters. Specifically, we tuned *max\_depth*,  
336 which defines the maximum depth of a tree, *eta*, step size shrinkage parameter to prevent  
337 overfitting, *subsample*, a subsample ratio of the training instances, *colsample\_bytree*, a  
338 subsample ratio of columns for each tree, and *min\_child\_weight*, a minimum number of  
339 instances needed to be in each tree node. Details regarding the hyperparameter settings  
340 and final optimal parameters can be found in S1 Table 5. We also used the 5-fold cross-  
341 validation to ensure the model is not an overfit to the data. The model's performance was  
342 assessed using R-squared values. The model fit was further validated using Adj-R  
343 squared and RMSE metrics through a secondary analysis involving random partitioning  
344 of the data into training (80%) and test (20%) sets. We then applied SHAP on the best-fit  
345 model to rank the features in the order of their contribution. SHAP values for each variable  
346 were computed to evaluate their positive and negative impacts on sand fly vector

347 densities and presented in a global feature importance bar diagram and local explanation  
348 summary plots. All analytical steps were implemented within the R statistical environment  
349 (version 4.1.0) [40].

350

351

## 352 **Results**

### 353 **Sand fly species composition and sex ratio**

354 *P. argentipes* was the predominant sand fly species captured, accounting for  
355 38,594 sand flies (female: male ratio = 4,246:34,348), (Table 2). The remaining sand flies  
356 (n=333; <1%) belonged to the genus *Sergentomyia* (data not shown). The female-to-male  
357 ratio in the total *P. argentipes* sand fly collection was approximately 1:8.2, indicating that  
358 there were approximately eight times more males than females in the collection. The  
359 female-to-male ratio of *P. argentipes* varied depending on the trap type, with a ratio of  
360 1:9.9 in the cattle-baited traps and 1:1.8 in the light traps.

361

362 **Table 2: The total of *P. argentipes* recorded monthly using different collection**  
363 **methods and annual average density of *P. argentipes* in sentinel sites from March**  
364 **2018 Feb 2020.**

365

| Surveillance Site | CBNT | LT  | Total | Annual average density of <i>P. argentipes</i> sandflies |
|-------------------|------|-----|-------|----------------------------------------------------------|
| Ambanpola (NW)    | 4619 | 358 | 4977  | 2488.5                                                   |
| Dickwella (SP)    | 7720 | 353 | 8073  | 4036.5                                                   |
| Delft (NP)        | 1917 | 29  | 1946* | 5838*                                                    |
| Mamadala (SP)     | 8704 | 387 | 9091  | 4545.5                                                   |
| Kataragama (UP)   | 3825 | 305 | 4130  | 2065.0                                                   |

|                 |                                 |                               |                                  |        |
|-----------------|---------------------------------|-------------------------------|----------------------------------|--------|
| Mahaoya (EP)    | 1859                            | 226                           | 2085                             | 1042.5 |
| Mirigama (WP)   | 3016                            | 171                           | 3187                             | 1593.5 |
| Peradeniya (CP) | 72                              | 166                           | 238**                            | 515**  |
| Talawa (NC)     | 2473                            | 236                           | 2709                             | 1354.5 |
| Welioya (NP)    | 1691                            | 467                           | 2158                             | 1079   |
| <b>TOTAL</b>    | 35896<br>(♀=3290)<br>♀:♂= 1:9.9 | 2698<br>(♀=956)<br>♀:♂= 1:1.8 | 38594<br>(♀=4,246)<br>♀:♂= 1:8.2 |        |

366 \*Based on 4 collections during the period

367 \*\* 2 CBNT and 24 LT cycles collections

368

### 369 **Spatial dynamics**

370 The spatial densities of *P. argentipes* captured were highly heterogeneous and  
371 variable. Based on the density the sites were arbitrarily classified into High >2500, Mid  
372 1500-2500 and Low <1500 zones. Mamadala, Delft Island and Dickwella were within the  
373 high sand fly density zone, whereas Kataragama, Mirigama and Ambanpola were in mid  
374 sand fly density zone, and Thalawa, Welioya, Peradeniya and Mahaoya were within the  
375 low sand fly zone (Table 2). The sand fly densities positively correlated with the  
376 leishmaniasis incidence in these areas with a tendency for high disease burden areas to  
377 record high sand fly densities (Fig 1) though this pattern was not consistent in all districts  
378 with the Spearman's rank correlation coefficient being 0.57, (p-value > 0.088).

379

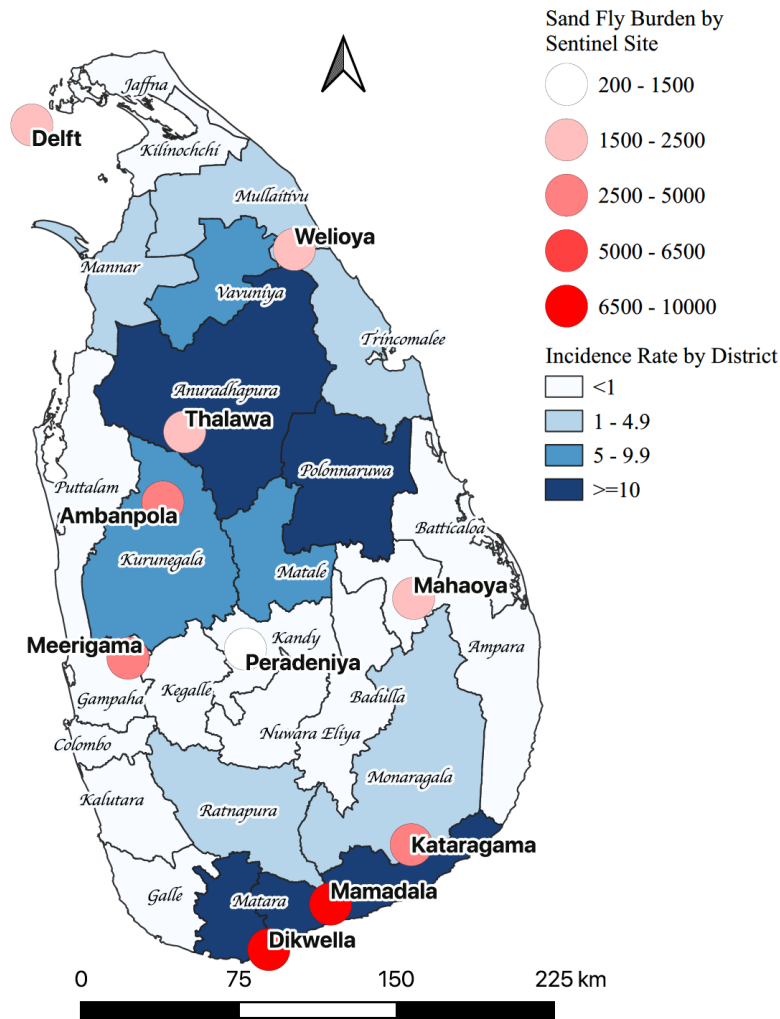

380

381

382 **Fig 1. Sand fly burden by sentinel site and annual average leishmaniasis incidence**

383 **rate (per 1000 population) by district from 2018 to 2020 in Sri Lanka.** The blue shaded

384 areas indicate the case burden and the red shaded circles show the geographical

385 distribution and the cumulative number of sand flies collected at each sentinel site for the

386 study period. Black solid lines in the map represent the boundaries of administrative

387 districts. Source of the base file: [https://data.humdata.org/dataset/sri-lanka-](https://data.humdata.org/dataset/sri-lanka-administrative-levels-0-4-boundaries)

388 [administrative-levels-0-4-boundaries](https://data.humdata.org/dataset/sri-lanka-administrative-levels-0-4-boundaries)

389



390 **Exposure-lag-response associations between weather variables and**  
391 **leishmaniasis vector indices**

392 The overall pooled results of the two staged hierarchical meta-analysis using  
393 DLNM approach suggested that rainfall, ambient temperature, soil temperature measured  
394 at 10cm depth at 8.30 am, sunshine hours, mean relative humidity, wind speed and  
395 evaporation were associated with leishmaniasis vector activity (as measured by the UV  
396 LED CDC traps) at different lag dimensions across all study settings. The exposure-  
397 response curves of these climate variables with the corresponding statistically significant  
398 lags are given in Fig 2 and Fig 3. The full spectrum of the associations (lag 0 to lag 3) of  
399 each climate variable are given in the S1 Fig 4 to Fig 10.

400

401

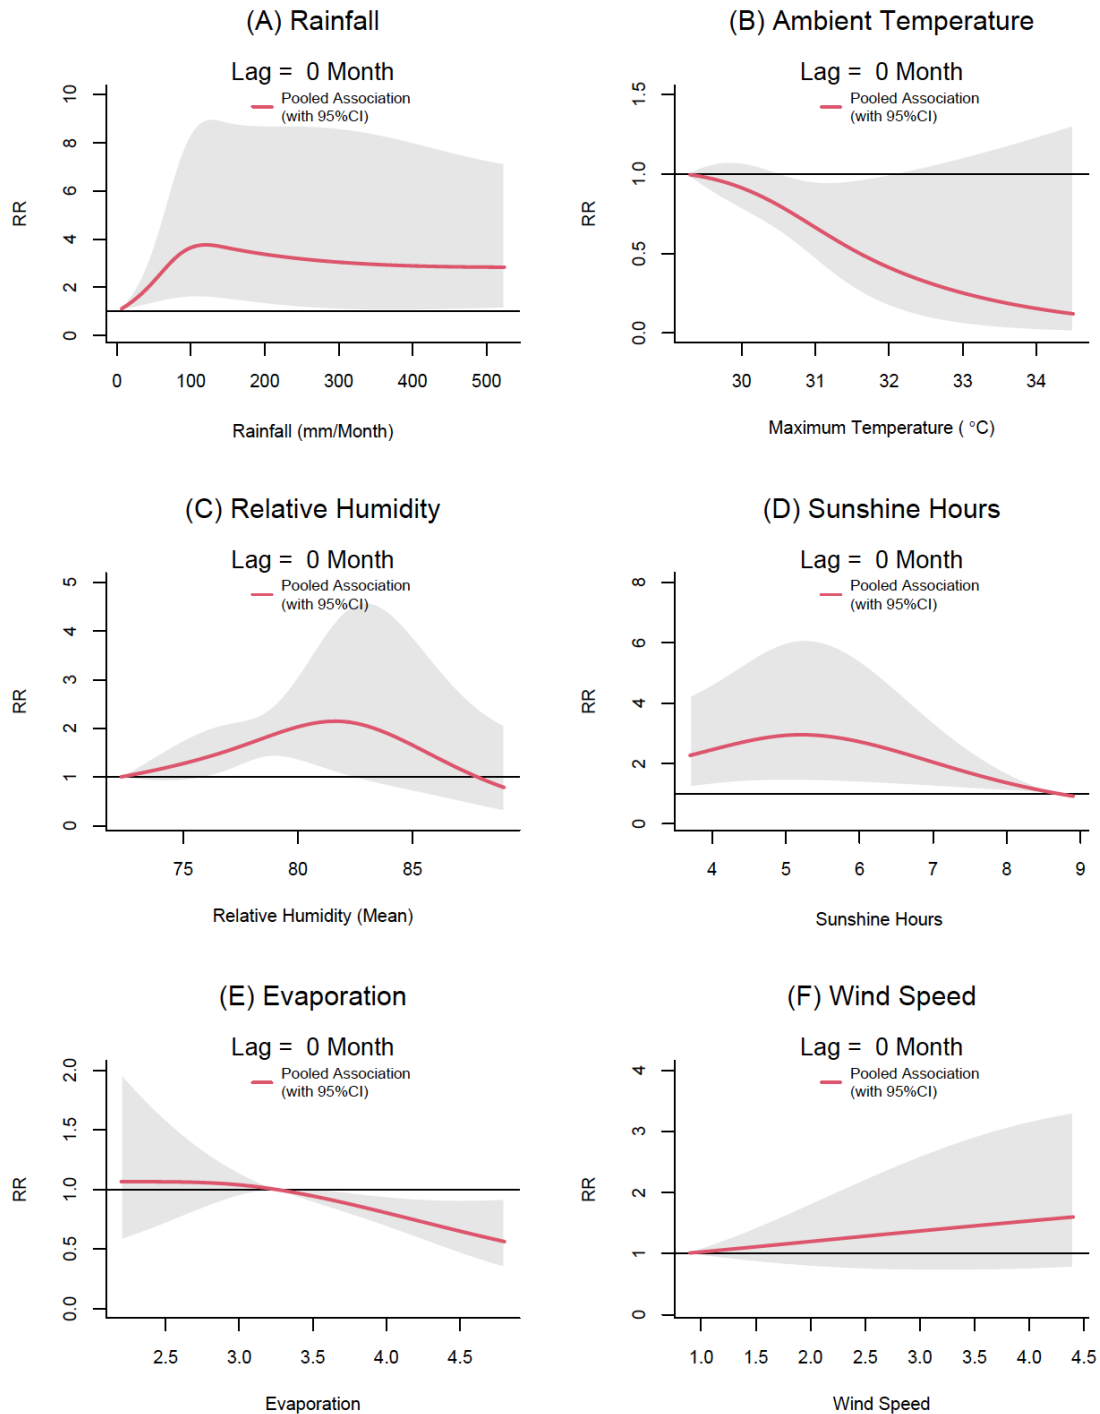

402  
 403 **Fig 2. Relative risk (RR) of leishmaniasis vector activity (measured by UV LED CDC**  
 404 **traps) by rainfall (A), ambient temperature (maximum temperature) (B), average**  
 405 **relative humidity (C), sunshine hours (D), evaporation (E) and wind speed (F) at a**  
 406 **lag of 0 months.** The exposure-response functions at lag of 0 month were predicted from

407 the pooled exposure-response function obtained from the meta-analysis for all  
408 surveillance sites in Sri Lanka, 2018–20. Shaded areas are 95% CIs. Relative risks were  
409 calculated with reference to the risk at a rainfall value of 0 mm per month, maximum  
410 temperature of 29.3°C, average relative humidity of 72.25, average evaporation of 3.3mm  
411 and wind speed of kmh<sup>-1</sup>. The most important lags for each exposure variable were  
412 selected for presentation. The full spectrum of exposure-lag response associations is  
413 given in S1, Fig 4 to Fig 10.

414

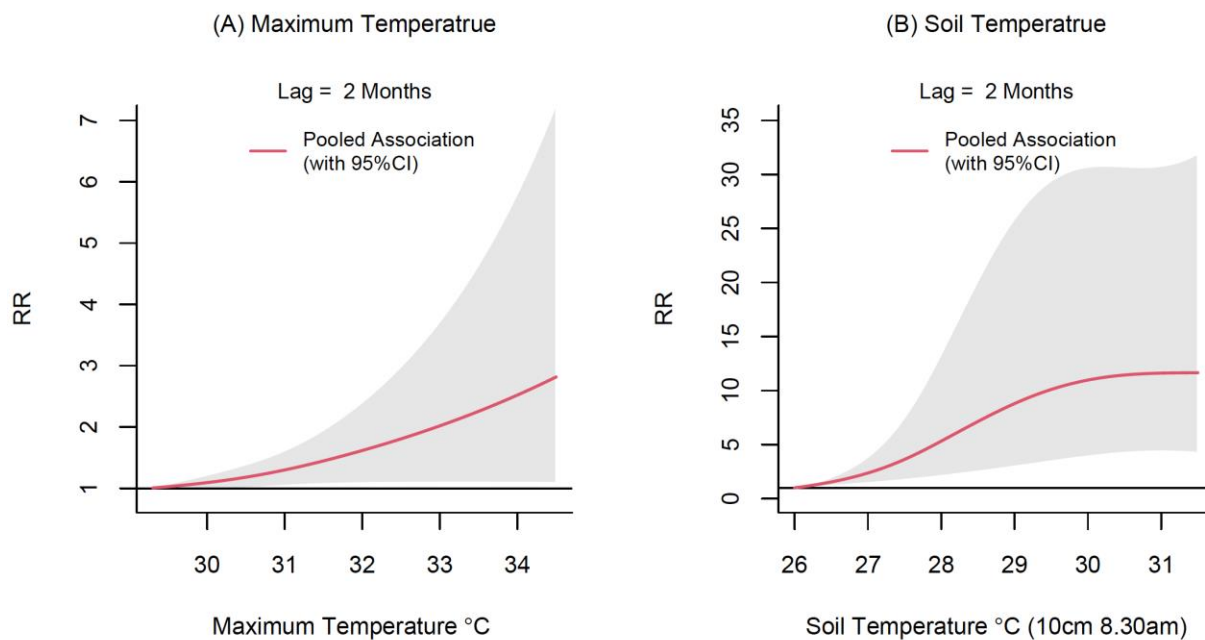

415 **Fig 3. Relative risk (RR) of leishmaniasis vector activity (measured by UV LED CDC**  
416 **traps) by ambient temperature (maximum) (panel A) and soil temperature measured**  
417 **at 8.30 am at 10cm below the surface and evaporation (panel B) at the lag of 2**  
418 **months.** The exposure-response functions at each lag were predicted from the pooled  
419 exposure-response function obtained from the meta-analysis for all surveillance sites in  
420 Sri Lanka, 2018–20. Shaded areas are 95% CIs. Relative risks were calculated with

422 reference to the risk at a soil temperature of 26°C. The full spectrum of the associations  
 423 is given in S1, Fig 5 and Fig 9.

424  
 425

426 **Relative contribution of climate and non-climate variables on sand fly densities**

427 Fig 4 ranks the twenty predictor variables (climate and non-climate) based on their  
 428 SHAP values in descending order. These values elucidate the significance of each  
 429 variable in influencing sand fly densities, as measured by the light trap (LT per trap)  
 430 across all surveillance sites. The global feature importance plot illustrates the relative  
 431 contribution of each feature, while the local explanation summary demonstrates how  
 432 these features impact sand fly density across the entire spectrum of values.

433  
 434

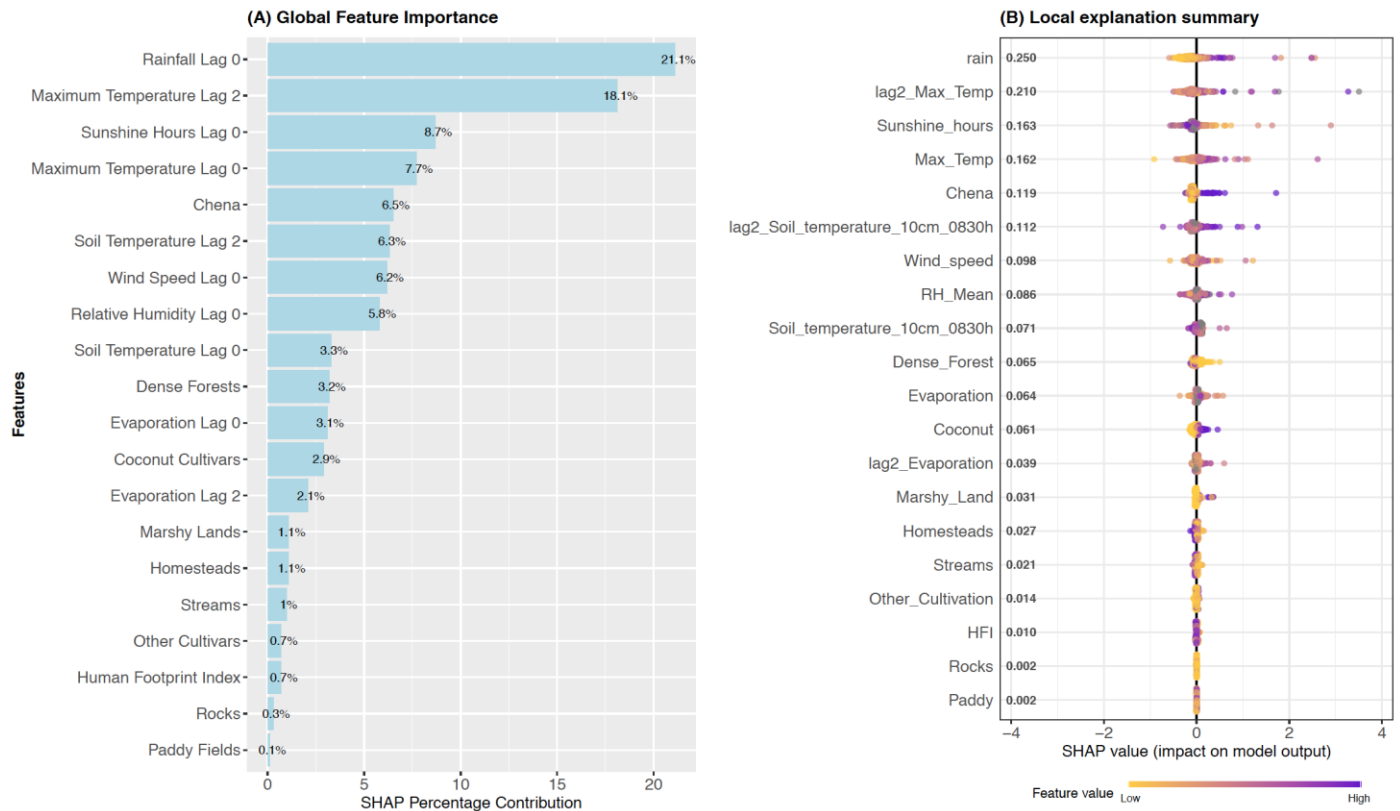

435

436

437 **Fig 4. SHAP feature importance plot for sand fly densities measured by light traps.**

438 The panel A (Global Feature of Importance) bar chart presents the percentage

439 contribution of mean SHAP values estimated for each feature. The panel B (Local

440 Explanation Summary) is a set of beeswarm plots showing feature impact on the model

441 output in their full range of values. The purple color indicates a higher value of

442 corresponding variables and the yellow color indicates a lower value. The dot's position

443 on the x-axis shows the impact that feature on the model's prediction of sand fly densities.

444 SHAP dependency plot for each variable with better visual effect is given in the S1 Figs

445 11 and 12.

446

447 Climate variables appeared to be relatively more important for the sand fly

448 densities when compared to the non-climate variables. Rainfall showed the highest

449 contribution, followed by maximum temperature lag 2, sunshine hours lag 0, maximum

450 temperature lag 0, soil temperature lag 2, wind speed lag 0, relative humidity lag 0 and

451 evaporation lag 0. Out of the non-climate contextual factors, chena cultivation and dense

452 forest were relatively important compared to other non-climate variables.

453

#### 454 **Rainfall**

455 When pooled across all the sentinel sites, the rainfall appeared to be associated

456 with the risk of increasing sand fly density measured by UV LED CDC trap at lag of 0 (Fig

457 2 panel A). As shown in the S1 Fig 4, when the lags are increasing, the exposure-

458 response associations become less obvious. With reference to the risk at a rainfall value

459 of 0, the increase in rainfall was associated with the statistically significant increase in the

460 RR of sand fly density throughout its range of values. The maximum RR of 3.76 with a  
461 95% CI of 1.58 to 8.96 was observed at the rainfall of 120 mm per month. Thereafter, the  
462 RR was observed to slightly decrease with increasing rainfall up to the extreme rainfall  
463 value of 524mm per month (RR of 2.83 with 95% CI of 1.12 to 7.14). However, a  
464 statistically significant Q test of heterogeneity (p-value 0.003) revealed a substantial  
465 variation in the exposure-response association among surveillance sites, with an I statistic  
466 of 49%. The local explanation summary (Fig 4, panel B) and SHAP dependence plots (S1  
467 Fig 11) demonstrate that increasing rainfall values predominantly positively influence  
468 sand fly densities.

469

#### 470 **Ambient Temperature**

471 At the lag of 0 months, the increase in ambient temperature (maximum  
472 temperature) appeared to reduce the RR of sand fly density (Fig 2 panel B). With  
473 reference to the lowest temperature value in the range (29.3°C), the sand fly activity  
474 appeared to be reduced by each unit increase in the temperature. The associations were  
475 statistically significant between 30.6 °C to 32 °C and the minimum relative risk observed  
476 at the temperature value of 34.5 °C was 0.12 (95%CI; 0.01 to 1.3). Conversely, the  
477 increasing maximum temperature at a lag of 2 months increased the RR of sand fly  
478 density and was more influential compared to the lag 0 effect (Fig 3 panel A and Fig 4).  
479 The highest RR observed was 2.81(95% CI; 1.09 to 7.35) at 34.5 °C. The temperature-  
480 sand fly density association was homogeneous across all surveillance sites (S1 Table 4).

481

#### 482 **Relative humidity**

483 With reference to the minimum RH value of 72.25, the relative risk of vector activity  
484 appeared to increase with the increase in RH up to 82 (2.14; 95% CI = 1.04 to 4.38) at  
485 the lag of 0 months Fig 2 panel C. The RR however, Q test was statistically significant (p-  
486 value 0.012) with  $I^2$  of 49.6% indicating substantial heterogeneity among surveillance  
487 sites. The SHAP dependency plot (S1 Fig 11) illustrates that increasing RH elevates the  
488 RR, with extreme values tending to decrease it.

489

### 490 **Sunshine hours**

491 Increasing sunshine hours appeared to reduce the RR of sand fly densities at a lag of 0  
492 months. The maximum relative risk observed (2.93; 95% CI = 1.43 to 6.0) was at 5 hours  
493 of sunshine per day (Fig 2 panel D). When the daily average sunshine hours further  
494 increased, the relative risk of vector activity also appeared to decrease. A similar pattern  
495 was observed at a lag of 1 month. The association was not statistically significant, with a  
496 further increase in lags (S1 Fig 7) The observation was homogeneous across all the  
497 settings as suggested by the non-significant Q test (2.77, p-value = 0.950). Our analysis  
498 was limited to five surveillance sites (Embilipitiya, Thalawa, Ambanpola, Katharagama  
499 and Dikwella) due to the limited availability of ground and remote sensing data on  
500 sunshine hours.

501

### 502 **Wind speed**

503 An increase in wind speed appeared to increase the risk of vector activity at the lag of 0  
504 months (Fig, 2F). However, the associations were not statistically significant up to a lag  
505 of 3 months (S1 Fig, 8). The associations appeared to be homogeneous across sites

506 (S1 Table 4). The SHAP dependency plot (S1 Fig 11) illustrates that the extreme values  
507 of wind speed have a negative influence on sand fly densities.

508

### 509 **Soil temperature**

510 Increasing soil temperature with a lag of 2 months and measured at 8.30 am at 10cm  
511 below the surface was associated with increasing relative risk of sand fly densities (Fig 3  
512 panel B). The risk of vector activity started to increase at a lag of 1 month and reached  
513 its maximum at the 2-month lag period before reducing at the lag of 3 months (S1 Fig 9)  
514 At a lag of 2 months, the relative risk of sand fly density peaked at 11.6 (95% CI: 4.38 to  
515 30.76) when the soil temperature reached its maximum value of 31.5°C. Similar to the  
516 ambient temperature the relative risk of sand fly activity decreased with increasing soil  
517 temperature at a lag of 0 months. With reference to the risk estimated at 26°C, the  
518 lowest relative risk was observed to be 0.12 (95%CI; 0.03 to 0.40) at a soil temperature  
519 value of 31°C. At a lag of 0 months, the observed reduction in the risk of vector activity  
520 was homogeneous across study settings as suggested by the non-significant Q test.  
521 The heterogeneity was statistically significant at a lag of 2 months (S1 Table 4).

522

### 523 **Evaporation**

524 With reference to the evaporation value of 3.25 (which was the median evaporation value  
525 observed when averaged across all the settings) the risk of sand fly density appeared to  
526 decrease with increasing evaporation at a lag of 0 months when the evaporation value  
527 exceeded 3.6 (S1 Fig 10). The minimum relative risk observed (0.56; 95% CI = 0.92 to  
528 0.34) was at an evaporation value of 4.8. An opposite pattern was observed at a lag of 2



529 months where the RR appeared to increase with increasing evaporation (S1 Fig10). The  
530 association was not statistically significant with a further increase in lag periods. The  
531 observation was homogeneous across all the settings as suggested by the Q test (S1  
532 Table 3, p-value = 0.339). Evaporation appeared to be the least influential climate variable  
533 based on the SHAP ranking (Fig 4).

534

### 535 **Non-climate contextual variables**

536 The high land area of chena ~~cultivation~~, low land areas of dense forests and high land  
537 areas of coconut ~~cultivation~~ emerged as important non-climatic factors influencing sand  
538 fly densities across the surveillance sites. Moreover, other cultivars, marshy lands and  
539 paddy fields in comparatively large land areas exhibited a positive influence on sand fly  
540 densities. Conversely, a high density of homesteads and high values of the human  
541 footprint index were associated with decreased sand fly densities. Additionally, large land  
542 areas with streams were found to have a diminishing effect on sand fly density (Fig 4 and  
543 S1 Fig 12).

544

### 545 **Discussion**

546 The aim of the study was to describe the distribution of the sand fly species in different  
547 geographic zones related to disease hotspots, and quantify the effect of climatic and non-  
548 climate variables on sand fly vector abundance in selected sentinel sites that represent  
549 the varying geographical and climatic zones in Sri Lanka. The temporal variability of sand  
550 fly densities was investigated over a period of 24 months through a uniform trap  
551 placement across the surveillance sites. Concurrent weather variables viz. monthly

552 average rainfall, ambient temperature, relative humidity, wind speed, soil temperature,  
553 evaporation and sunshine hours and non-climate contextual information collected in  
554 proximity to the surveillance site were used to quantify their location specific influence on  
555 the sand fly densities. Using a combination of statistical modeling and a machine learning  
556 approach we were able to identify climate and non-climate drivers of sand fly vector  
557 abundance and their relative importance across Sri Lanka.

558 The high attractiveness of sand flies to cattle as demonstrated by high counts in CBNTs  
559 may be attributed to their preference for animal blood, which is enhanced by its greater  
560 body size and CO<sub>2</sub>/odour output, and the availability of the cattle for a sustained and  
561 successful blood feed [41,42]. The densities of sand flies appeared to differ based on the  
562 climatic zone in which the sentinel sites were located. Among the study sites,  
563 Kataragama, Mamadala, and Dickwella (dry climatic zone) exhibited higher densities of  
564 *P. argentipes*. In contrast, Ambanpola and Mahaoya (intermediate zone) and Welioya (in  
565 the dry zone) had lower sand fly collections. Previous studies conducted in Sri Lanka  
566 have also reported *P. argentipes* as the predominant species of sand flies [43–45].  
567 However, the current study demonstrates, for the first time, the widespread presence of  
568 *P. argentipes* across the country, including Delft Island. The sex ratio of sand flies  
569 collected in this study was significantly biased towards males in the genus *Phlebotomus*.  
570 This is a known phenomenon where male flies are attracted in large numbers to traps  
571 containing female flies [46].

572 A positive but not statistically significant correlation was observed between sand fly  
573 density and the incidence of leishmaniasis cases recorded from 2018 to 2020. However,  
574 this finding may not be surprising since leishmaniasis is a chronic disease, and the

575 manifestation of symptoms typically occurs months or even years after exposure.  
576 Additionally, there are multiple factors affecting the transmission of infection, with vector  
577 abundance being one among many such variables [47].

578 Our analysis revealed that climate conditions conducive to sand fly activity are  
579 characterised by a combination of moderate rainfall, low sunshine hours, low ambient  
580 temperatures, high relative humidity, and low evaporation rates. The combination of  
581 above climatic factors creates an environment that supports increasing sand fly activity  
582 in real-time and further modified by various non-climatic factors [48]. We noticed a minor  
583 decrease in the relative risk (RR) of sandfly activities during periods of extreme rainfall.  
584 However, this observation was not consistent across all surveillance sites. Once  
585 averaged across all nine study settings, the increasing ambient and soil temperature at  
586 real-time (lag zero) negatively correlated with the sand fly activity reducing the relative  
587 risk below one. Similarly, laboratory experimental studies have found that increasing  
588 temperatures more than 32°C was associated with higher mortality rates (around 72%) of  
589 adult sand flies [10]. However, the ambient temperature (maximum) and soil temperature  
590 at a lag of two months exhibited a statistically significant association with an increased  
591 risk of sand fly vector activity. Remarkably, the ambient temperature with a lag of two  
592 months emerged as a highly influential factor, second only to rainfall in its impact on sand  
593 fly densities. The studies have found that complete egg to adult development of the sand  
594 fly species was temperature-dependent and ranged from 27.89 (+/- 1.88) days at 32°C to  
595 246.43 (+/- 13.83) at 18°C [49]. This time lag between oviposition and emergence of  
596 adults correlates with the observed time lag of two months found between the soil  
597 temperature and sand fly abundance in all Sri Lankan study settings, which might be well

598 within the favourable range for egg hatching and larval development. Therefore, it would  
599 be reasonable to extrapolate that the exposure to the optimal soil temperatures two  
600 months ago may have produced a large number of adults that were attracted to the light  
601 traps at the time of surveillance. Increasing mean RH up to 82 during the same month of  
602 surveillance may have created a suitable environment for the sand flies to be active. The  
603 negative effect of the evaporation and the higher RR observed for the low number of  
604 sunshine hours at lag zero signify the relative inactivity of the sand flies during extremely  
605 dry conditions with a low RH. Among the factors investigated, wind speed is likely to have  
606 the potential to influence the dynamic behaviour of sand flies, particularly in terms of gene  
607 flow between populations without geographical barriers. The gene flow can facilitate the  
608 transfer of genes that promote sand fly survival, such as insecticide resistance genes  
609 [45], which can have negative implications for vector control programs. Although wind  
610 speed emerged as one of the influential climate variables, with extremely high values  
611 having a negative influence observed in the machine learning approach, our study did not  
612 identify a biologically plausible lagged relationship between sand fly density and wind  
613 speed.

614 Among the non-climate variables measured within a five-kilometre radius from the  
615 surveillance sites, cultivation lands have emerged as significant factors influencing sand  
616 fly vector densities. Notably, chena cultivation, coconut cultivars, and to some extent,  
617 paddy cultivars appeared to play important roles. Alongside other cultivars categorized  
618 under broader cultivation lands, these agricultural areas are primarily situated in the dry  
619 and intermediate zones of the country. The presence of a low volume of dense forests  
620 and streams also suggests conditions typical of the dry zone, potentially contributing to

621 the higher influence on sand fly vector densities observed at the lower end of their range.  
622 However, non-agricultural marshy lands, commonly found in the wet and intermediate  
623 zones, were also found to have a positive effect. Furthermore, agricultural areas in the  
624 dry and intermediate zones in the country typically exhibit lower population densities and  
625 reduced human activity compared to urban or residential areas. In our study, we observed  
626 that a low number of homesteads and lower values of the Human Footprint Index (HFI)  
627 positively influenced sand fly densities. This phenomenon can be attributed to the  
628 favourable breeding and resting conditions for sand flies in these less disturbed  
629 environments. The lower population density and reduced human activity in agricultural  
630 lands may contribute to the proliferation of sand fly populations, ultimately resulting in  
631 higher densities observed in these areas. Agricultural practices may create suitable  
632 breeding grounds due to the associated high prevalence of rodents, livestock shelters  
633 and irrigation canals [48,50]. A positive and favourable interaction of the weather  
634 variables in the dry zone may be more conducive for the sand fly vectors to thrive and  
635 transmit the *Leishmania* parasites.

636 The sand fly vector burden varied in relation to selected climatic variables, either at real-  
637 time or with a time lag. The findings may be utilized in forecasting vector burden (thus the  
638 risk of disease transmission) based on climatic data to facilitate the planning of effective  
639 control strategies against leishmaniasis in endemic countries. Further research  
640 endeavours aimed at assessing the impact of environmental factors, including wind  
641 speed, may provide valuable insights to aid the combat of future public health challenges,  
642 particularly those associated with climate change and for the development of location-  
643 specific strategic plans for disease control.

644

645 **Limitations**

646 The data on sunshine hours was limited to five surveillance sites. Furthermore, the  
647 density of sand flies in Delft Island was monitored only bi-annually due to logistical  
648 constraints and was analysed against the climatic data recorded off the Jaffna peninsula  
649 (40 km away from Delft), which has the nearest meteorological station, which is also a  
650 limitation of this study. The boundary knots of the cross-basis matrices were positioned  
651 at the average values of the maximum and minimum values of all division-specific climate  
652 variables. This approach aimed to obtain a meaningful estimate for the second-stage  
653 meta-analysis. However, it led to limitations in exposure range by excluding extreme  
654 values of the respective variables observed in certain surveillance settings. As a result,  
655 the parameter estimates were constrained and unable to capture the full range of  
656 exposure in real-world situations. This limitation does not apply to the XGBoost approach,  
657 thereby complementing the interpretation constraints of the DLNM approach by capturing  
658 the full exposure range. The estimated relative risk values are likely to be context-  
659 dependent and may have limitations in terms of generalizability. However, the lagged  
660 effect is believed to have universal applicability due to its association with the biologically  
661 plausible temporal dynamics of sand fly vector life cycles.

662

663 **Implications of the findings for vector control, disease control, climate change**  
664 **and meeting WHO 2030 targets for NTDs**

665 The findings are significant in forecasting vector abundance and designing effective  
666 strategies to curtail leishmaniasis transmission in a given setting during an era of

667 escalating concern over climate change. This study while adding to the evidence linking  
668 leishmaniasis incidence with changes in environmental factors, provides novel  
669 information on the likely effect of selected environmental factors on developing sand fly  
670 stages in the soil, with the resultant lag effect observed on adult sand fly abundance. This  
671 observation may be used in establishing an early disease warning system for local  
672 populations to aid control, which may also be used as a model for other endemic  
673 countries. Favourable climatic conditions in terms of temperature, rainfall and humidity  
674 experienced by the local sand fly population are likely to promote leishmaniasis  
675 transmission. A temperature range between 29.9 and 33.0 °C, a humidity level up to 82%  
676 and the presence of moderate rainfall (up to 120mm per month) were optimal parameters  
677 for the development and longevity of sand flies, increasing the risk of transmission of  
678 leishmaniasis. Furthermore, the results presented here suggest that the state of  
679 vegetation may also play a role in establishing favourable environmental conditions for  
680 leishmaniasis across Sri Lanka. Overall, these findings demand a regionally-coordinated  
681 strategic plan to address the apparent threat of increasing risk of leishmaniasis,  
682 particularly in the face of changing climatic factors and to test the potential use of vector  
683 abundance forecasting in planning vector control for better impact. Such an effort may  
684 increase the chance of achieving the WHO 2030 targets for effective control and  
685 elimination of NTDs in the region.

686

## 687 **Conclusions**

688 The sand fly abundance correlates with environmental parameters such as rainfall, soil  
689 temperature, ambient temperature, relative humidity, evaporation rate and sunshine

690 hours either at real-time or with a time lag. The findings can be used for forecasting of  
691 sand fly densities and the design of effective strategies for leishmaniasis transmission  
692 accordingly in a given setting. Combining these environmental findings with  
693 epidemiological and demographic data and robust surveillance systems will be essential  
694 to further enhance our ability to predict disease outbreaks. This holistic approach,  
695 incorporating a comprehensive understanding of the environmental factors and the  
696 ecology of leishmaniasis, will refine existing approaches and develop more accurate  
697 disease outbreak predictions to enable effective infection prevention and control.

698

699

#### 700 **Additional files**

701 **Additional file: S1 Supplement**

702

#### 703 **Acknowledgements**

704 We acknowledge Mr. Sunil Shantha and Mr. M. P. Ariyapala for field assistance to  
705 collect sand flies, and the Head and staff of the Parasitic Diseases Research Unit,  
706 Department of Parasitology, Faculty of Medicine, University of Colombo for logistical  
707 help. Research reported in this publication was supported by the National Institute of  
708 Allergy and Infectious Diseases of the National Institutes of Health under Award  
709 Number U01AI136033. The content is solely the responsibility of the authors and does  
710 not necessarily represent the official views of the National Institutes of Health, USA.

711

#### 712 **Abbreviations**

713 DLNM: Distributed Lag Non-Linear; VL: Visceral leishmaniasis; MCL: Mucocutaneous  
714 leishmaniasis; CL: Cutaneous leishmaniasis; WHO: World Health Organization; RDHS:



715 Regional Director of Health Services; CBNT: Cattle-baited net trap; UV light trap:  
716 Ultraviolet light trap; NE: Northeast; SW: Southwest; LT: Light trap; RR: Relative risk;  
717 MOH: Medical Officer of Health; q-AIC: Quasi-Akaike information criterion; CI: Confident  
718 Interval; RH: Relative humidity; CO<sub>2</sub> : Carbon dioxide; NTDs: Neglected Tropical  
719 Diseases.

720

#### 721 **Ethics approval and consent to participate**

722 Ethics approval for the study was granted by the Ethics Review Committee, Faculty of  
723 Medicine, University of Colombo, Sri Lanka (Ref no. EC-17-062).

724

#### 725 **Consent for publication**

726 Not applicable.

727

#### 728 **Availability of data and materials**

729 Climate data collected for the study is available upon request from the Department of  
730 Parasitology, Faculty of Medicine, University of Colombo, Colombo, Sri Lanka and  
731 Department of Research and Evaluation, National Institute of Health Sciences Kalutara,  
732 Sri Lanka.

733

#### 734 **Competing interests**

735 The authors declare that they have no competing interests.

736

737

#### 738 **Funding**

739 This work was supported by the National Institute of Allergy and Infectious Diseases of  
740 the National Institutes of Health, USA, under award number U01AI136033. The content  
741 is solely the responsibility of the authors and does not necessarily represent the official  
742 views of the National Institutes of Health.

743

#### 744 **Author contributions**

745 SCS: Planned and executed the field studies, designed methodology and collected  
746 the data.

747 PL: Data analysis, application of statistical methods, use of computational methods  
748 to analyse study data, drafted sections of the manuscript.

749 DRKP: Data analysis and initial draft of manuscript

750 MFRS: Data collection, analysis and initial draft of manuscript

751 BGDNK: Provided inputs in research design and manuscript editing

752 NDK: Formulated research aims and ideas, acquired financial support for the project,  
753 oversight and leadership responsibility for the study and preparation of the manuscript.

754

755

756

757

#### 758 **References**

- 759 1. WHO Report. WHO fact sheet: Leishmaniasis. 2023. Available:  
760 <https://www.who.int/news-room/fact-sheets/detail/leishmaniasis>
- 761 2. Alexander B, Maroli M. Control of phlebotomine sandflies. *Med Vet Entomol.*  
762 2003;17: 1–18. doi:10.1046/j.1365-2915.2003.00420.x
- 763 3. Ayhan N, N. Charrel R. Sandfly-Borne Viruses of Demonstrated/Relevant Medical  
764 Importance. *Vectors and Vector-Borne Zoonotic Diseases.* IntechOpen; 2019.

- 765 doi:10.5772/intechopen.81023
- 766 4. Colmenares M, Kar S, Goldsmith-Pestana K, McMahon-Pratt D. Mechanisms of  
767 pathogenesis: Differences amongst Leishmania species. Transactions of the  
768 Royal Society of Tropical Medicine and Hygiene. Oxford Academic; 2002. p. S3.  
769 doi:10.1016/s0035-9203(02)90044-1
- 770 5. Scheufele CJ, Giesey RL, Delost GR. The global, regional, and national burden of  
771 leishmaniasis: An ecologic analysis from the Global Burden of Disease Study  
772 1990-2017. Journal of the American Academy of Dermatology. Mosby Inc.; 2021.  
773 pp. 1203–1205. doi:10.1016/j.jaad.2020.08.043
- 774 6. Savić S, Savić S. Vectors and Vector-Borne Zoonotic Diseases. Vectors and  
775 Vector-Borne Zoonotic Diseases. IntechOpen; 2019.  
776 doi:10.5772/intechopen.77985
- 777 ~~7. Colmenares M, Kar S, Goldsmith-Pestana K, McMahon-Pratt D. Mechanisms of~~  
778 ~~pathogenesis: Differences amongst Leishmania species. Trans R Soc Trop Med~~  
779 ~~Hyg. 2002;96: S3. doi:10.1016/s0035-9203(02)90044-1~~
- 780 8. Scheufele CJ, Giesey RL, Delost GR. The global, regional, and national burden of  
781 leishmaniasis: An ecologic analysis from the Global Burden of Disease Study  
782 1990-2017. Journal of the American Academy of Dermatology. J Am Acad  
783 Dermatol; 2021. pp. 1203–1205. doi:10.1016/j.jaad.2020.08.043
- 784 9. Volf P, Volfova V. Establishment and maintenance of sand fly colonies. J Vector  
785 Ecol. 2011;36: 1–9. doi:10.1111/j.1948-7134.2011.00106.x
- 786 10. Kasap OE, Alten B. Laboratory estimation of degree-day developmental  
787 requirements of Phlebotomus papatasi (Diptera: Psychodidae). J Vector Ecol.  
788 2005;30: 328–333.
- 789 11. Boussaa S, Kahime K, Samy AM, Salem A Ben, Boumezzough A. Species  
790 composition of sand flies and bionomics of Phlebotomus papatasi and P. sergenti  
791 (Diptera: Psychodidae) in cutaneous leishmaniasis endemic foci, Morocco.  
792 Parasites and Vectors. 2016;9: 1–11. doi:10.1186/s13071-016-1343-6
- 793 12. Chaves LF, Calzada JE, Valderrama A, Saldaña A. Cutaneous Leishmaniasis and  
794 Sand Fly Fluctuations Are Associated with El Niño in Panamá. PLoS Negl Trop  
795 Dis. 2014;8: e3210. doi:10.1371/journal.pntd.0003210

- 796 13. De Oliveira EF, Casaril AE, Fernandes WS, De Saboya Ravanelli M, De Medeiros  
797 MJ, Gamarra RM, et al. Monthly distribution of phlebotomine sand flies, and biotic  
798 and abiotic factors related to their abundance, in an urban area to which visceral  
799 leishmaniasis is endemic in Corumbá, Brazil. PLoS One. 2016;11: e0165155.  
800 doi:10.1371/journal.pone.0165155
- 801 14. Faraj C, Ouahabi S, Adlaoui EB, El Elkohli M, Lakraa L, El Rhazi M, et al.  
802 Insecticide susceptibility status of *Phlebotomus* (*Paraphlebotomus*) *sergenti* and  
803 *Phlebotomus* (*Phlebotomus*) *papatasi* in endemic foci of cutaneous leishmaniasis  
804 in Morocco. Parasites and Vectors. 2012;5: 51. doi:10.1186/1756-3305-5-51
- 805 15. Ramezankhani R, Sajjadi N, Nezakati esmaeilzadeh R, Jozi SA, Shirzadi MR.  
806 Climate and environmental factors affecting the incidence of cutaneous  
807 leishmaniasis in Isfahan, Iran. Environ Sci Pollut Res Int. 2018;25: 11516–11526.  
808 doi:10.1007/s11356-018-1340-8
- 809 16. Rodgers M de SM, Fonseca E, Nieto P del M, Malone JB, Luvall JC, McCarroll  
810 JC, et al. Use of soil moisture active passive satellite data and WorldClim 2.0 data  
811 to predict the potential distribution of visceral leishmaniasis and its vector  
812 *Lutzomyia longipalpis* in Sao Paulo and Bahia states, Brazil. Geospat Health.  
813 2022;17. doi:10.4081/gh.2022.1095
- 814 17. Karunaweera ND, Senanayake S, Ginige S, Silva H, Manamperi N,  
815 Samaranyake N, et al. Spatiotemporal distribution of cutaneous leishmaniasis in  
816 Sri Lanka and future case burden estimates. PLoS Negl Trop Dis. 2021;15:  
817 e0009346. doi:10.1371/journal.pntd.0009346
- 818 18. Karunaweera ND, Pralong F, Siriwardane HVYD, Ihalamulla RL, Dedet JP. Sri  
819 Lankan cutaneous leishmaniasis is caused by *Leishmania donovani* zymodeme  
820 MON-37. Trans R Soc Trop Med Hyg. 2003;97: 380–381. doi:10.1016/S0035-  
821 9203(03)90061-7
- 822 19. Senanayake SASC, Abeyewicreme W, Dotson EM, Karunaweera ND.  
823 Characteristics of phlebotomine sandflies in selected areas of Sri Lanka.  
824 Southeast Asian J Trop Med Public Health. 2015;46: 994–1004. Available:  
825 /pmc/articles/PMC6206496/
- 826 20. Gajapathy K, Peiris LB, Goodacre SL, Silva A, Jude PJ, Surendran SN. Molecular

- 827 identification of potential leishmaniasis vector species within the *Phlebotomus*  
828 (*Euphlebotomus*) *argentipes* species complex in Sri Lanka. *Parasites and*  
829 *Vectors*. 2013;6: 1–9. doi:10.1186/1756-3305-6-302
- 830 21. Rijal S, Sundar S, Mondal D, Das P, Alvar J, Boelaert M. Eliminating visceral  
831 leishmaniasis in South Asia: The road ahead. *BMJ Open*. British Medical Journal  
832 Publishing Group; 2019. doi:10.1136/bmj.k5224
- 833 22. WHO EMRO | Development of strategic plan and guidelines | NTD-news |  
834 Neglected tropical diseases. [cited 4 Apr 2024]. Available:  
835 <https://www.emro.who.int/neglected-tropical-diseases/ntd-news/news.html>
- 836 23. World Health Organization. Ending the neglect to attain the Sustainable  
837 Development Goals: a road map for neglected tropical diseases 2021–2030.  
838 Geneva: World Health Organization. 2020. Available:  
839 <https://apps.who.int/iris/handle/10665/341313>
- 840 24. Burt TP, Weerasinghe KDN. Rainfall distributions in Sri Lanka in time and space:  
841 An analysis based on daily rainfall data. *Climate*. 2014;2: 242–263.  
842 doi:10.3390/cli2040242
- 843 25. Alahacoon N, Edirisinghe M. Spatial variability of rainfall trends in sri lanka from  
844 1989 to 2019 as an indication of climate change. *ISPRS Int J Geoinf*. 2021;10: 84.  
845 doi:10.3390/ijgi10020084
- 846 26. Lane RP, Pile MM, Amerasinghe FP. Anthropophagy and aggregation behaviour  
847 of the sandfly *Phlebotomus argentipes* in Sri Lanka. *Med Vet Entomol*. 1990;4:  
848 79–88. doi:10.1111/j.1365-2915.1990.tb00263.x
- 849 27. Hersbach H., Bell B., Berrisford P., Biavati G., Horányi A., Muñoz Sabater J., et  
850 al. ERA5 hourly data on single levels from 1940 to present. Copernicus Climate  
851 Change Service (C3S) Climate Data Store (CDS). [cited 9 Sep 2023].  
852 doi:10.24381/cds.adbb2d47
- 853 28. Bolton D. The computation of equivalent potential temperature. *Mon Weather*  
854 *Rev*. 1980;108: 1046–1053. doi:10.1175/1520-  
855 0493(1980)108<1046:TCOEPT>2.0.CO;2
- 856 29. Survey Department of SriLanka. 2024 [cited 10 Mar 2024]. Available:  
857 <https://www.survey.gov.lk/>

- 858 30. Di Marco M, Ferrier S, Harwood TD, Hoskins AJ, Watson JEM. Wilderness areas  
859 halve the extinction risk of terrestrial biodiversity. *Nature*. 2019;573: 582–585.  
860 doi:10.1038/s41586-019-1567-7
- 861 31. Keys PW, Barnes EA, Carter NH. A machine-learning approach to human  
862 footprint index estimation with applications to sustainable development. *Environ*  
863 *Res Lett*. 2021;16: 044061. doi:10.1088/1748-9326/ABE00A
- 864 32. Gasparrinia A, Armstrong B, Kenward MG. Distributed lag non-linear models. *Stat*  
865 *Med*. 2010;29: 2224–2234. doi:10.1002/sim.3940
- 866 33. Gasparrini A, Armstrong B. Reducing and meta-analysing estimates from  
867 distributed lag non-linear models. *BMC Med Res Methodol*. 2013;13: 1–10.  
868 doi:10.1186/1471-2288-13-1
- 869 34. Chen T, Guestrin C. XGBoost: A scalable tree boosting system. *Proceedings of*  
870 *the ACM SIGKDD International Conference on Knowledge Discovery and Data*  
871 *Mining*. Association for Computing Machinery; 2016. pp. 785–794.  
872 doi:10.1145/2939672.2939785
- 873 35. Gasparrini A, Armstrong B, Kenward MG. Multivariate meta-analysis for non-  
874 linear and other multi-parameter associations. *Stat Med*. 2012;31: 3821–3839.  
875 doi:10.1002/sim.5471
- 876 36. Huedo-Medina TB, Sánchez-Meca J, Marín-Martínez F, Botella J. Assessing  
877 heterogeneity in meta-analysis: Q statistic or I<sup>2</sup> Index? *Psychol Methods*.  
878 2006;11: 193–206. doi:10.1037/1082-989X.11.2.193
- 879 37. Bhaskaran K, Gasparrini A, Hajat S, Smeeth L, Armstrong B. Time series  
880 regression studies in environmental epidemiology. *Int J Epidemiol*. 2013;42:  
881 1187–1195. doi:10.1093/ije/dyt092
- 882 38. Gasparrini A, Armstrong B, Kenward MG. Multivariate meta-analysis for non-  
883 linear and other multi-parameter associations. *Stat Med*. 2012;31: 3821–3839.  
884 doi:10.1002/sim.5471
- 885 39. Lundberg SM, Erion G, Chen H, DeGrave A, Prutkin JM, Nair B, et al. From local  
886 explanations to global understanding with explainable AI for trees. *Nat Mach*  
887 *Intell*. 2020;2: 56–67. doi:10.1038/s42256-019-0138-9
- 888 40. R Core Team. R: A language and environment for statistical computing. R

- 889 Foundation for Statistical Computing, Vienna, Austria. Vienna, Austria: Version  
890 4.1.0 (2021-05-18); Available: <https://www.r-project.org/>
- 891 41. Laurent BS, Oy K, Miller B, Gasteiger EB, Lee E, Sovannaroeth S, et al. Cow -  
892 baited tents are highly effective in sampling diverse *Anopheles* malaria vectors in  
893 Cambodia. *Malar J.* 2016;15: 1–11. doi:10.1186/s12936-016-1488-y
- 894 42. Gebresilassie A, Yared S, Aklilu E, Kirstein OD, Moncaz A, Tekie H, et al. Host  
895 choice of *Phlebotomus orientalis* ( Diptera : Psychodidae ) in animal baited  
896 experiments : a field study in Tahtay Adiyabo district , northern Ethiopia. *Parasit*  
897 *Vectors.* 2015;8: 1–10. doi:10.1186/s13071-015-0807-4
- 898 43. Surendran SN, Sarma DK, Jude PJ, Kempainen P, Kanthakumaran N,  
899 Gajapathy K, et al. Molecular characterization and identification of members of the  
900 *Anopheles subpictus* complex in Sri Lanka. *Malar J.* 2013;12: 1–11.  
901 doi:10.1186/1475-2875-12-304
- 902 44. Gajapathy K, Tharmasegaram T, Eswaramohan T, Peries LBSL, Jayanetti R,  
903 Surendran SN. DNA barcoding of Sri Lankan phlebotomine sand flies using  
904 cytochrome c oxidase subunit I reveals the presence of cryptic species. *Acta*  
905 *Trop.* 2016;161: 1–7. doi:10.1016/j.actatropica.2016.05.001
- 906 45. Pathirage DRK, Weeraratne TC, Senanayake SC, Parakrama Karunaratne SHP,  
907 Karunaweera ND. Genetic diversity and population structure of *Phlebotomus*  
908 *argentipes*: Vector of *Leishmania donovani* in Sri Lanka. *PLoS One.* 2021;16: 1–  
909 13. doi:10.1371/journal.pone.0256819
- 910 46. Elnaiem DE, Khogali A, Alsharif B, Dakein O, Jibreel T, Hassan M, et al.  
911 Understanding sand fly sampling methods: Sticky traps are attraction-based and  
912 not interceptive sampling tools of *Phlebotomus orientalis*. *Parasites and Vectors.*  
913 2020;13: 1–15. doi:10.1186/s13071-020-04249-1
- 914 47. Murray HW, Berman JD, Davies CR, Saravia NG. Advances in leishmaniasis.  
915 *Lancet.* 2005;366: 1561–1577. doi:10.1016/S0140-6736(05)67629-5
- 916 48. Claborn DM. The Biology and Control of Leishmaniasis Vectors. *J Glob Infect Dis.*  
917 2010;2: 127. doi:10.4103/0974-777X.62866
- 918 49. Feliciangeli MD. Natural breeding places of phlebotomine sandflies. *Med Vet*  
919 *Entomol.* 2004;18: 71–80. doi:10.1111/j.0269-283X.2004.0487.x

920 50. Ganser C, Wisely SM. Patterns of spatio-temporal distribution, abundance, and  
921 diversity in a mosquito community from the eastern Smoky Hills of Kansas. J  
922 Vector Ecol. 2013;38: 229–236. doi:10.1111/j.1948-7134.2013.12035.x

923  
924  
925  
926

## 927 **Figure legends**

### 928 **Fig 1 Leishmaniasis annual average incidence rate.**

929 Leishmaniasis annual average incidence rate 2018-2020 (per 1000 population) by  
930 districts and locations of sand fly surveillance sites in Sri Lanka. Black solid lines in the  
931 map represent the boundaries of administrative districts. Green shaded circles indicate  
932 the location of long-term sand fly surveillance sites. Source of the base file:

933 [https://data.humdata.org/dataset/sri-lanka-administrative-levels-0-4-boundaries.](https://data.humdata.org/dataset/sri-lanka-administrative-levels-0-4-boundaries)

934  
935  
936  
937  
938

### 939 **Fig 2 Relative risk (RR) of leishmaniasis vector activity.**

940 Relative risk (RR) of leishmaniasis vector activity (measured by UV LED CDC traps) by  
941 rainfall (a), ambient temperature (maximum temperature) (b), average relative humidity  
942 (c), sunshine hours (d), evaporation (e) and wind speed (f) at a lag of 0 months. The  
943 exposure-response functions at lag of 0 month were predicted from the pooled  
944 exposure-response function obtained from the meta-analysis for all surveillance sites in  
945 Sri Lanka, 2018–20. Shaded areas are 95% CIs. Relative risks were calculated with  
946 reference to the risk at a rainfall value of 0 mm per month, maximum temperature of  
947 29.3°C, average relative humidity of 72.25, average evaporation of 3.3mm and wind  
948 speed of kmh<sup>-1</sup>. The most important lags for each exposure variable were selected for  
949 presentation. The full spectrum of exposure-lag response associations is given in the  
950 appendix (pp 7–14).



951

952 **Fig 3 Relative risk (RR) of leishmaniasis vector activity by soil temperature.**

953 Relative risk (RR) of leishmaniasis vector activity (measured by UV LED CDC traps) by  
954 soil temperature measured at 8.30 am at 10cm below the surface (panel a) and  
955 evaporation (panel b) at the lag of 2 months. The exposure-response functions at each  
956 lag were predicted from the pooled exposure-response function obtained from the meta-  
957 analysis for all surveillance sites in Sri Lanka, 2018–20. Shaded areas are 95% CIs.  
958 Relative risks were calculated with reference to the risk at a soil temperature of 26<sup>0</sup>C.  
959 The full spectrum of the associations is given in supplementary figures (S13-S14).

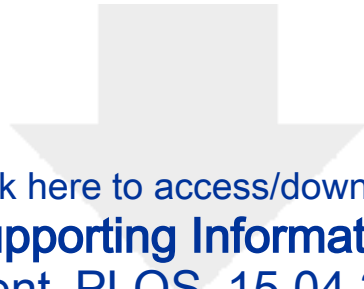

[Click here to access/download](#)

**Supporting Information**

Supplement\_PLOS\_15.04.2024.docx

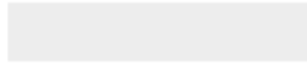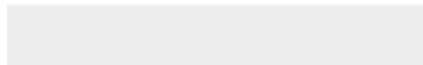

Supplement: pntd.0012675.s003.pdf [file pntd.0012675.s003.pdf]
